# Supplementary material
Source: PubMed Central journal article supplement (PMC2629205)
Supplement: 0811350106_0811350106SI.pdf [file 0811350106_0811350106SI.pdf]

# Supporting Information

Zhang *et al.* 10.1073/pnas.0811350106

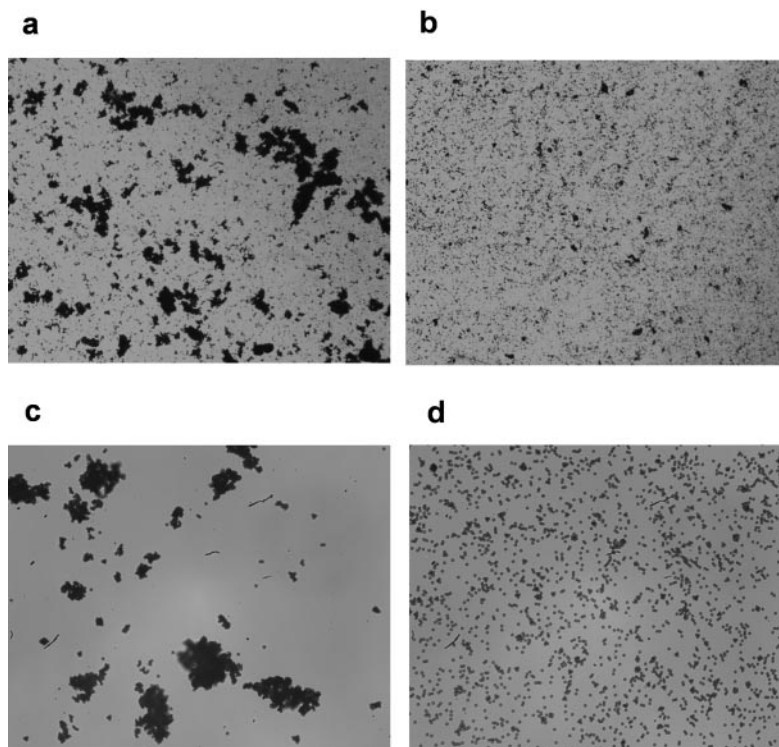

**Fig. S1.** Biological activity of the cadherin constructs were demonstrated by monitoring the aggregation and disaggregation of cadherin-functionalized beads in the presence or absence of  $\text{Ca}^{2+}$ , respectively. (a) E-cadherin His-tag monomer-coated beads incubated in 1.8 mM  $\text{Ca}^{2+}$  showed significant bead aggregation. (b) E-cadherin His-tag monomer-coated beads incubated in a  $\text{Ca}^{2+}$  free buffer did not aggregate. This buffer was prepared by passing 50 mM Tris buffer at pH 7.4 containing 100 mM NaCl, 10 mM KCl, and 0.2% (wt/vol) BSA (buffer TB) over a Chelex 100 resin (Bio-Rad) to chelate out  $\text{Ca}^{2+}$ . (c) Cadherin-Fc dimer-coated beads incubated in 1.8 mM  $\text{Ca}^{2+}$  showed significant bead aggregation. (d) Cadherin-Fc dimer-coated beads incubated in 2 mM EGTA (to chelate out free  $\text{Ca}^{2+}$ ) did not aggregate. (Magnification: a and b, 11.2 $\times$ ; c and d, 22.4 $\times$ .)

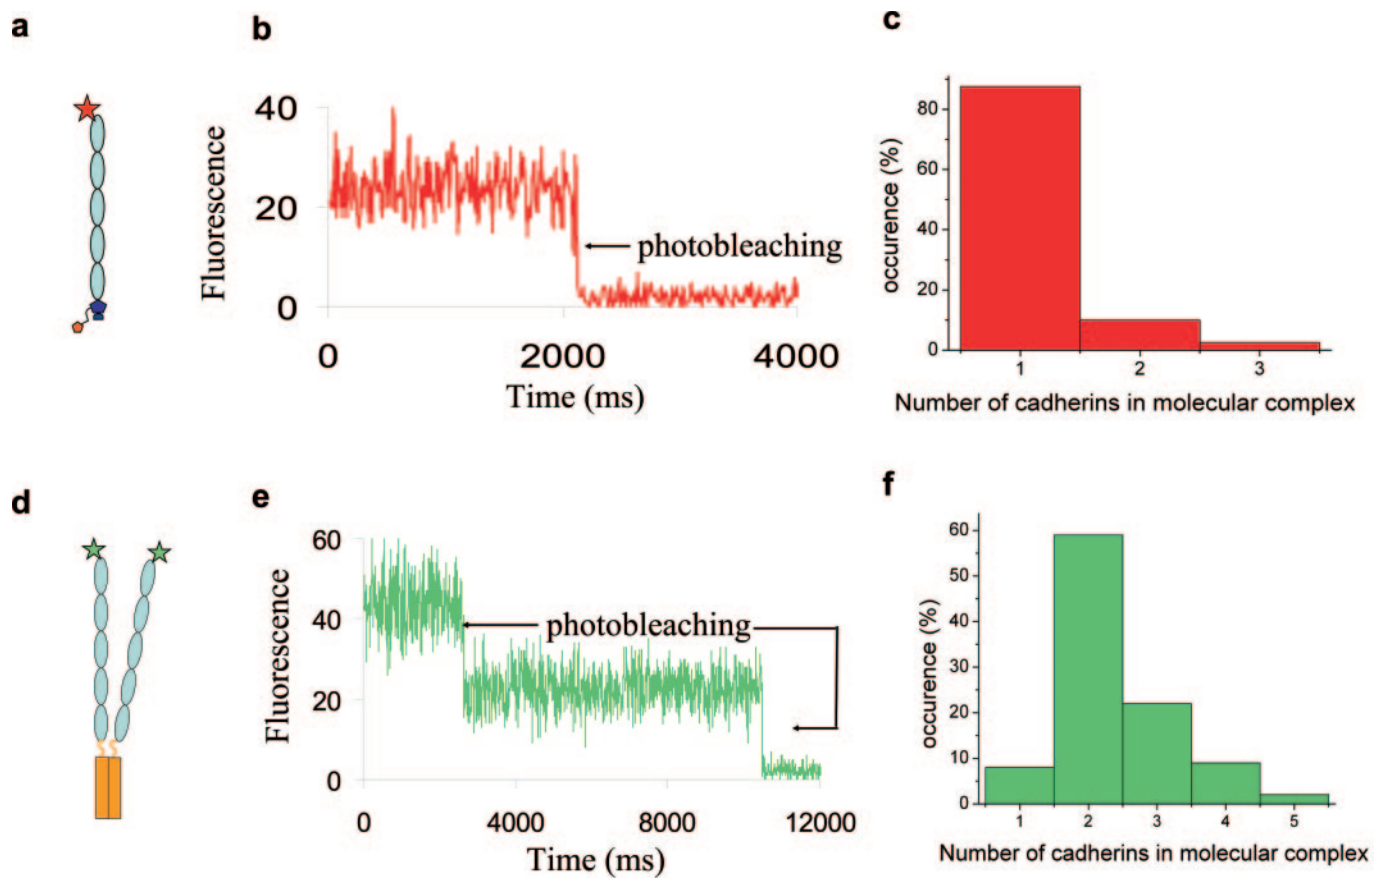

**Fig. S2.** Monitoring the oligomeric state of cadherin monomers and cadherin-Fc constructs. (a) The oligomeric state of the labeled cadherin monomer was measured by immobilizing the molecules on a surface, exciting the fluorophores, and monitoring their photobleaching. (b) A typical fluorescence time trace for the photobleaching of a monomer. Because the dye-to-protein labeling ratio was typically between 60% and 90%, monomers photobleach in a single step. (c) More than 85% of the cadherin molecules were observed to photobleach in a single step. (d) The dimeric state of the labeled cadherin-Fc construct was confirmed by immobilizing the molecules on a surface, exciting the fluorophores, and monitoring their photobleaching. (e) A typical fluorescence time trace for the photobleaching of a dimer. (f) More than 65% of the cadherin-Fc molecules were dimers.

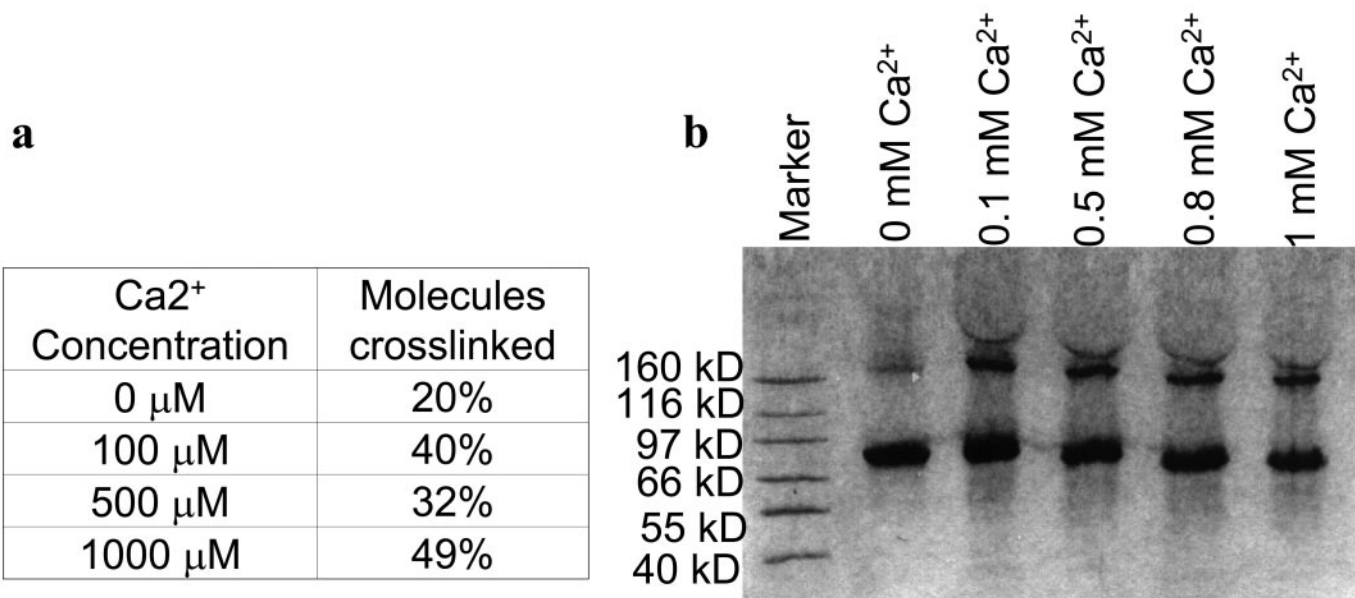

**Fig. S3.** Cadherin cross-linking yield at different calcium concentrations. (a) Donor- and acceptor-labeled cadherin monomers were cross-linked in solution to capture transient interactions between the proteins. Cross-linked dimers and non-cross-linked monomers were separated by using a sizing column, and the cross-linked dimer yield was measured by absorption at 280 nm. Cross-linking reactions were carried out in buffers containing 0, 0.1, 0.5, and 1 mM calcium. The cross-linked dimer yields at these calcium concentrations were 20%, 40%, 32% and 49%, respectively. (b) When the product of the cross-linking reaction is run on a denaturing gel and stained with coomassie dye, a cross-linked dimer fraction with molecular mass of  $\approx$ 150 kDa and a noncross-linked monomer fraction with molecular mass of  $\approx$ 75 kDa are observed. The yield of dimers cross-linked in 0 mM calcium is significantly lower than dimer yields at higher calcium concentrations.
